# Supplementary material for: A zeolite modified carbon paste electrode based on copper exchanged clinoptilolite nanoparticles for voltammetric determination of metronidazole
Source: Royal Society of Chemistry journal article supplement (doi:10.1039/c6ra28603h), 2017-01-01
Supplement: c6ra28603h1.pdf [file c6ra28603h1.pdf]

**Supplementary data:**

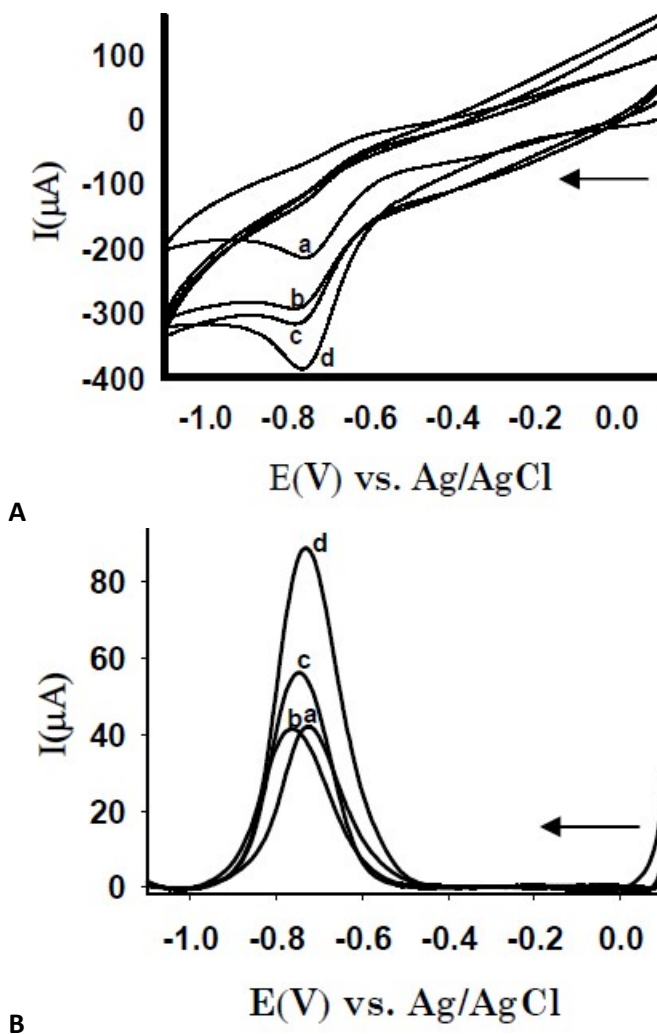

**SD1:** Effect of Cu(II) loading in the CV (A) and SqW (B) voltammetric response of the modified electrodes which their modifiers prepared in 0.1 (a), 0.25 (b), 0.4 (c) and 0.5 (d) M Cu(II) solutions; 0.1 M NaCl+ 0.005 M MNZ at pH 5.5, scan rate: 60 mV/s.

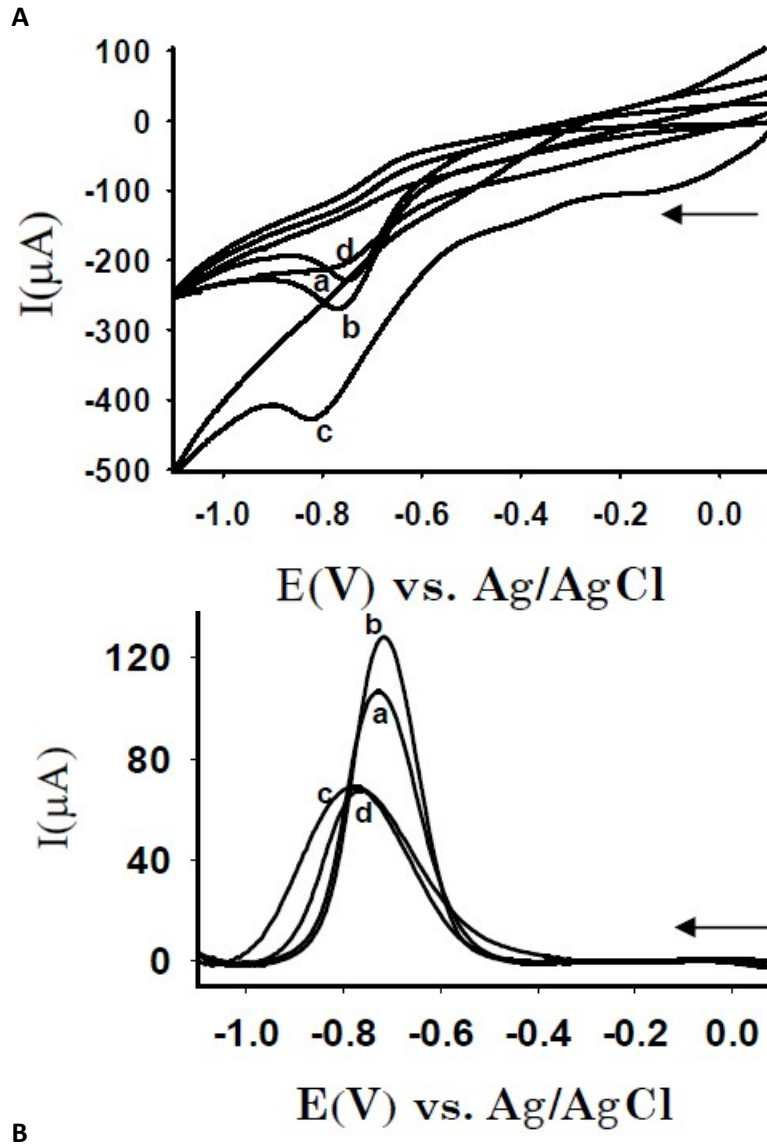

**SD2:** Effect of the percentage of Cu(II)0.5-CNP on the CV (A) and SqW (B) voltammetric response of the modified electrodes, a)10 , b) 20, c) 25 and d) 30% of the modifier; 0.1 M NaCl+ 0.005 M MNZ at pH 5.5, scan rate: 60 mV/s.

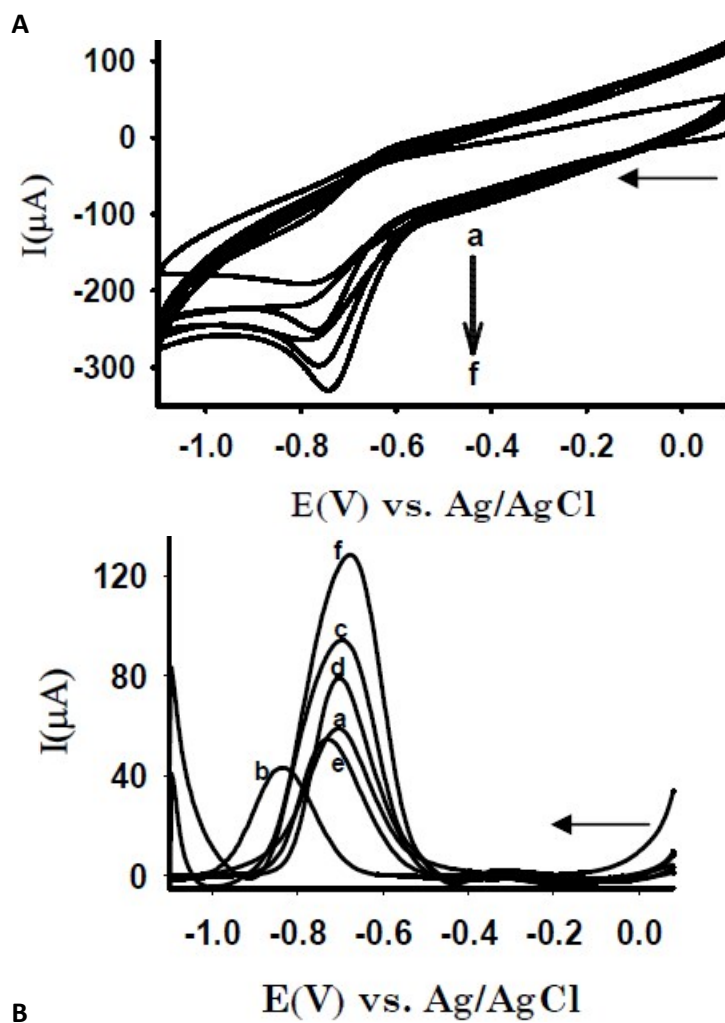

**SD3:** Effect of the supporting electrolyte on the CV (A) and SqW (B) voltammetric response of the Cu(II)0.5-CNP modified electrode in 0.1 M, a)MgCl<sub>2</sub>, b) KNO<sub>3</sub>, c) KCl, d) CaCl<sub>2</sub>, e)NaNO<sub>3</sub> and d) NaCl; + 0.005 M MNZ at pH 5.5, scan rate: 60 mV/s, 20% modifier.

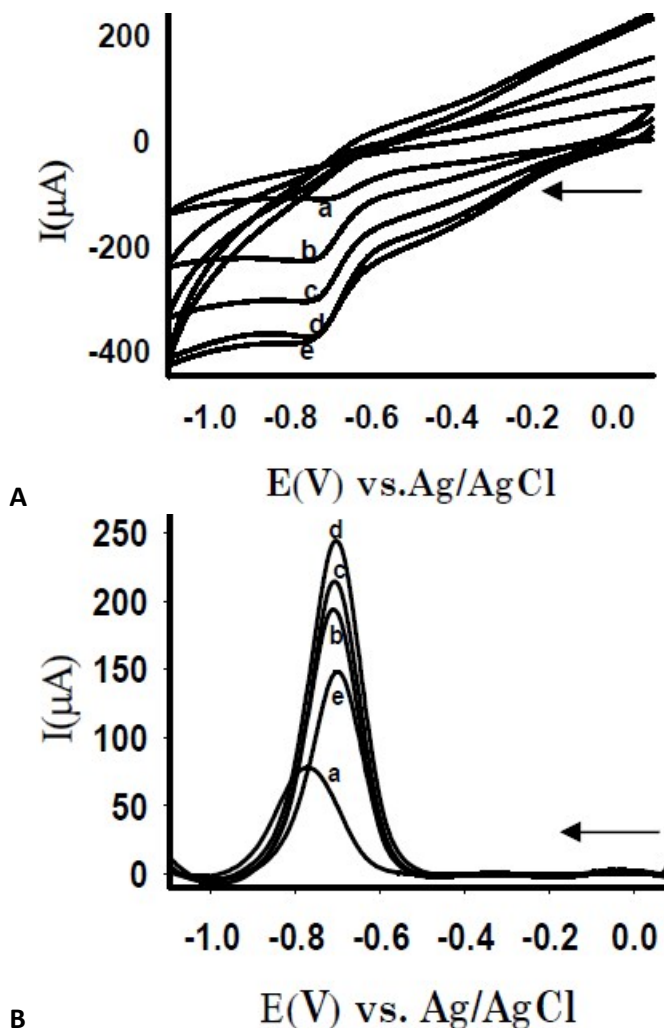

**SD4:** Effect of the concentration of NaCl supporting electrolyte on the CV (A) and SqW (B) voltammetric response of the Cu(II)0.5-CNP modified electrode in a) 0.1, b) 0.2, c) 0.3, d) 0.4, and d) 0.5 M; + 0.005 M MNZ at pH 5.5, scan rate: 60 mV/s, 20% modifier.

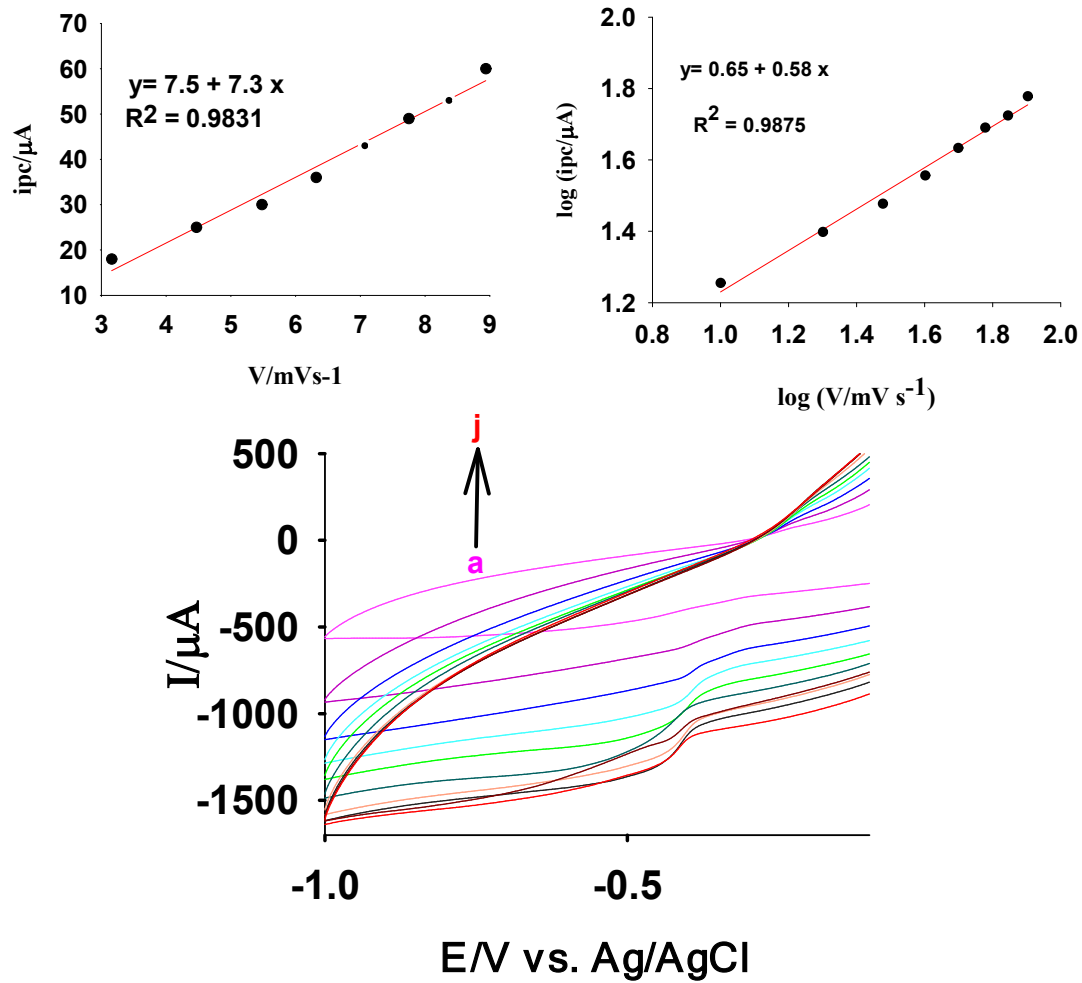

**SD5.** Effect of potential scan rate in the range of 10 to 100 mV/S in 0.4 M NaCl on the behavior of Cu(II)0.5-CNP (20% modifier; Insets: corresponding liner plots).

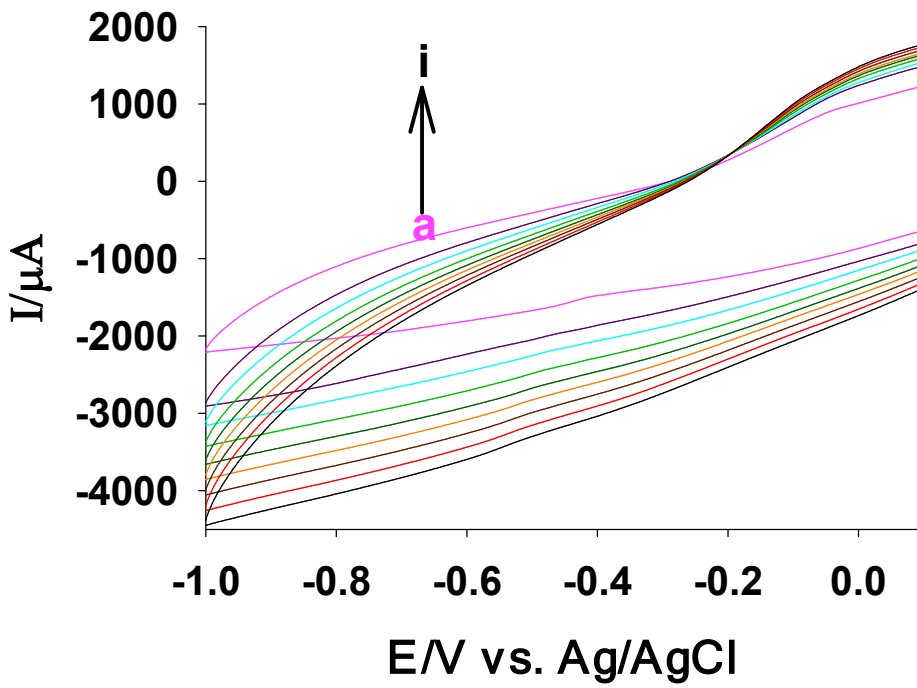

**SD6.** Effect of potential scan rate in the range of 150 to 500 mV/S in 0.4 M NaCl on the behavior of Cu(II)0.5-CNP (20% modifier).

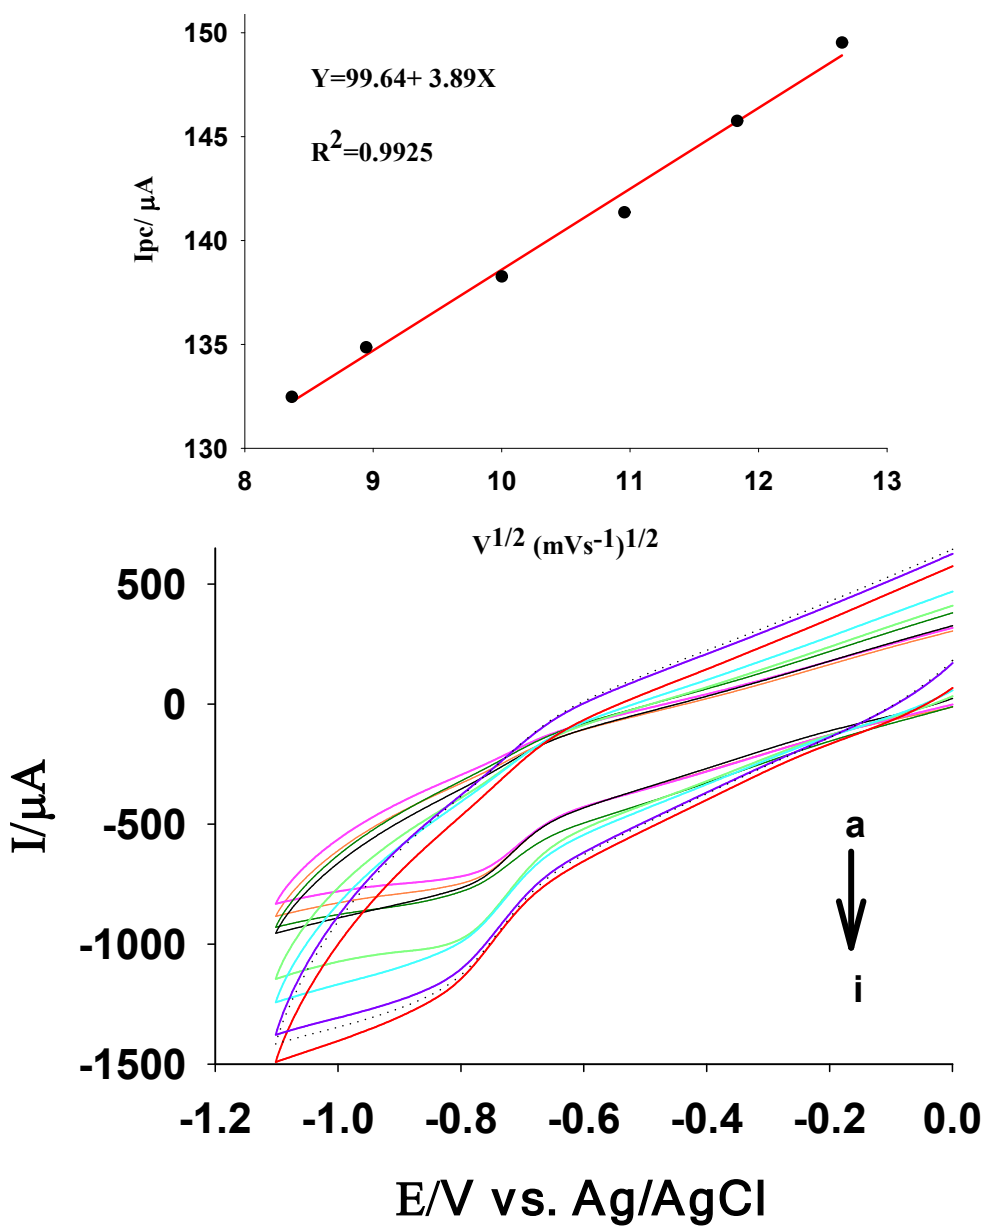

**SD7.** Effect of potential scan rate in the range of 150 to 500 mV/S in 0.4 M NaCl + 0.005 M MNZ at pH 5.5 on the behavior of Cu(II)0.5-CNP (20% modifier; Inset: corresponding liner plot).
